# Supplementary material for: Glyoxylate carboligase-based whole-cell biotransformation of formaldehyde into ethylene glycol via glycolaldehyde
Source: Royal Society of Chemistry journal article supplement (doi:10.1039/d1gc03549e), 2021-11-19
Supplement: d1gc03549e1.pdf [file d1gc03549e1.pdf]

## Supporting Information

### **Glyoxylate Carboligase-based Whole-Cell Biotransformation of Formaldehyde into Ethylene Glycol via Glycolaldehyde**

Hye-Jin Jo,<sup>[a]</sup> Jun-Hong Kim,<sup>[b]</sup> Ye-Na Kim,<sup>[a]</sup> Pil-Won Seo,<sup>[b]</sup> Chae-Yun Kim,<sup>[a]</sup> Ji-Won Kim,<sup>[b]</sup>  
Hanna Yu,<sup>[a]</sup> Huijin Cheon,<sup>[a]</sup> Eun Yeol Lee,<sup>[c]</sup> Jeong-Sun Kim,<sup>\*[b]</sup> and Jin-Byung Park<sup>\*[a]</sup>

<sup>a</sup> Department of Food Science and Engineering, Ewha Womans University, Seoul 03760, Republic of Korea

<sup>b</sup> Department of Chemistry, Chonnam National University, Gwangju 61186, Republic of Korea

<sup>c</sup> Department of Chemical Engineering (Integrated Engineering), Kyung Hee University, Gyeonggi-do 17104, Republic of Korea

19 Pages, 4 Tables, 2 Schemes, and 7 Figures are presented.

## Table of Contents

| Contents                                         | Page     |
|--------------------------------------------------|----------|
| <b>Supplemental tables, schemes, and figures</b> | <b>3</b> |
| Supplementary Tables                             | 3        |
| Supplementary Schemes                            | 10       |
| Supplementary Figures                            | 12       |

**Table S1.** Plasmids used in this study.

| Plasmids         | Description                                                    | Reference  |
|------------------|----------------------------------------------------------------|------------|
| pProEx Hta-HtALS | pBR322 origin, P <sub>T<sub>trc</sub></sub> , Amp <sup>R</sup> | This study |
| p.LIC B3-VvALS   | pBR322 origin, P <sub>T<sub>7</sub></sub> , Amp <sup>R</sup>   | This study |
| p.LIC B3-EcOCD   | pBR322 origin, P <sub>T<sub>7</sub></sub> , Amp <sup>R</sup>   | This study |
| p.LIC B3-DmGCL   | pBR322 origin, P <sub>T<sub>7</sub></sub> , Amp <sup>R</sup>   | This study |
| p.LIC B3-EcGCL   | pBR322 origin, P <sub>T<sub>7</sub></sub> , Amp <sup>R</sup>   | This study |
| pET21b(+)-FLS    | pBR322 origin, P <sub>T<sub>7</sub></sub> , Amp <sup>R</sup>   | 1          |
| pACYC-DhaT       | p15A origin, P <sub>T<sub>7</sub></sub> , Chl <sup>R</sup>     | 2          |
| pACYC-FucO       | p15A origin, P <sub>T<sub>7</sub></sub> , Chl <sup>R</sup>     | This study |

\* HtALS: acetolactate synthase from *Hydrogenobacter thermophilus*, EcOCD: oxalyl-CoA decarboxylases from *E. coli*, DmGCL: glyoxylate carboligase from *Deinococcus metallilatus*, EcGCL: glyoxylate carboligase from *E. coli*, DhaT: 1,3-propanediol dehydrogenase from *Klebsiella pneumoniae*, FucO: 1,2-propanediol oxidoreductase from *E. coli*

**Table S2.** Oligonucleotide primers used for PCR.

| Name                             | Primer sequence (5' - 3')                         |
|----------------------------------|---------------------------------------------------|
| HtALS                            | (F)-GGCGGTGGTGGCGGCATGGCCCGTAAAGGGGCTGA           |
|                                  | (R)-GTTCTTCTCCTTTGCGCCCTTAACCAACTAAGTACATTGTGTCAG |
| VvALS                            | (F)-GGCGGTGGTGGCGGCATGACAGCAATGTTGTCAGGCG         |
|                                  | (R)-GTTCTTCTCCTTTGCGCCCTTAAGTTCTCTCCGTTTTGCTTAGC  |
| EcOCD                            | (F)-GGCGGTGGTGGCGGCATGTCAGATCAACTTCAAATGACAG      |
|                                  | (R)-GTTCTTCTCCTTTGCGCCCTTAATTACCAGCGACTTGTTTTGG   |
| DmGCL                            | (F)-GGCGGTGGTGGCGGCATGCCGAGAATGACCGCGGT           |
|                                  | (R)-GTTCTTCTCCTTTGCGCCCTAGTCCAGCAACGCAATCGCG      |
| EcGCL                            | (F)-GGCGGTGGTGGCGGCATGGCAAAAATGAGAGCCGTTG         |
|                                  | (R)-GTTCTTCTCCTTTGCGCCCTTATTCATAGTGCATGAAGCAGG    |
| EcGCL <sub>R484M</sub>           | (F)-ATTCGTCAGTCACAAATGGCTTTTGACATGGAC             |
|                                  | (R)-GTCCATGTCAAAGCCATTTGTGACTGACGAAT              |
| EcGCL <sub>R484MR108L</sub>      | (F)-CCAGGCACCGCGCGCCCTTCTGCATAAAGAAGATTTT         |
|                                  | (R)-AAAATCTTCTTTATGCAGAAGGGCGCGCGGTGCCTGG         |
| EcGCL <sub>R484MQ258A</sub>      | (F)-GGATGGTGGGTCTGGCAACCGCGCATCGTTAC              |
|                                  | (R)-GTAACGATGCGCGGTTGCCAGACCCACCATCC              |
| EcGCL <sub>R484MN283Q</sub>      | (F)-ATCGGTAACCGTTTTGCTCAGCGTCATACCGGCTCG          |
|                                  | (R)-CGAGCCGGTATGACGCTGAGCAAAACGGTTACCGAT          |
| EcGCL <sub>R484MN284M</sub>      | (F)-GGTAACCGTTTTGCTAACATGCATACCGGCTCGGTAGAG       |
|                                  | (R)-CTCTACCGAGCCGGTATGCATGTTAGCAAAACGGTTACC       |
| EcGCL <sub>R484MN283QA28S</sub>  | (F)-GCCTTCGGTGTTCGGGATCTGCAATCAATCCGTTCTAC        |
|                                  | (R)-GTAGAACGGATTGATTGCAGATCCCGGAACACCGAAGGC       |
| EcGCL <sub>R484MN283QF114L</sub> | (F)-CGTCTGCATAAAGAAGATTTACAGGCCGTAGATATTGAA       |
|                                  | (R)-TTCAATATCTACGGCCTGTAAATCTTCTTTATGCAGACG       |
| EcGCL <sub>R484MN283QL257M</sub> | (F)-ATGGCCGGGATGGTGGGTATGCAAACCGCGCATCGTTAC       |
|                                  | (R)-GTAACGATGCGCGGTTGCATACCCACCATCCCGGCCAT        |
| EcGCL <sub>R484MN283QR284Q</sub> | (F)-GGTAACCGTTTTGCTCAGCAACATAACCGGCTCGGTAGAG      |
|                                  | (R)-CTCTACCGAGCCGGTATGTTGCTGAGCAAAACGGTTACC       |
| EcGCL <sub>R484MN283QL478M</sub> | (F)-AACAACGCTTATCTGGGGATGATTCGTCAGTCACAACGC       |
|                                  | (R)-GCGTTGTGACTGACGAATCATCCCCAGATAAGCGTTGTT       |

---

|                                  |                                             |
|----------------------------------|---------------------------------------------|
| EcGCL <sub>R484MN283QA485F</sub> | (F)-ATTCGTCAGTCACAAATGTTCTTTGACATGGACTACTGC |
|                                  | (R)-GCAGTAGTCCATGTCAAAGAACATTTGTGACTGACGAAT |

---

|      |                                               |
|------|-----------------------------------------------|
| FucO | (F)-ACCACAGCCAGGATCCGATGGCTAACAGAATGCTGGTGAAC |
|      | (R)-ATGCGGCCGCAAGCTTTTACCAGGCGGTATGGTAAAGCTC  |

---

**Table S3.** Data collection and structure refinement statistics.

|                                         |                               |
|-----------------------------------------|-------------------------------|
| Data Collection                         | DmGCL                         |
| Space group                             | C2                            |
| Unit cell dimensions                    |                               |
| a, b, c (Å),                            | 148.06, 106.47, 89.09         |
| a, b, g (°)                             | 90, 124.1, 90                 |
| Wavelength (Å)                          | 0.9796                        |
| Resolution (Å)                          | 50-2.10 (2.14-2.10)           |
| $R_{\text{sym}}$ (%)                    | 8.6 (66.6)                    |
| $I/\sigma(I)$                           | 19.15 (1.92)                  |
| Completeness (%)                        | 99.9 (97.0)                   |
| Redundancy                              | 6.5 (6.0)                     |
| Refinement                              |                               |
| Resolution (Å)                          | 44.78-2.10 (2.14-2.10)        |
| No. of reflections                      | 65709                         |
| $R_{\text{work}} / R_{\text{free}}$ (%) | 18.33 (27.21) / 19.82 (30.12) |
| No. atoms                               |                               |
| protein / water                         | 8590 / 375                    |
| RMSD                                    |                               |
| bond lengths (Å) / angles (°)           | 0.007 / 0.945                 |
| Average B-values (Å <sup>2</sup> )      | 55.5                          |
| Ramachandran plot (%)                   |                               |
| favored / allowed / outliers            | 95.86 / 3.33 / 0.81           |

Values in parentheses are for the highest-resolution shell.

4% of the randomly selected reflections were used for calculating  $R_{\text{free}}$  values.

**Table S4.** Homologous structures of FLS retrieved by DALI search

| PDB ID | Z-score | rmsd | No. of aligned residues | No. of residues | % of identity | Function annotation                             |
|--------|---------|------|-------------------------|-----------------|---------------|-------------------------------------------------|
| 5k2o   | 40.4    | 2.3  | 533                     | 585             | 26            | Acetohydroxyacid synthase                       |
| 2ji6   | 39.9    | 2.5  | 529                     | 559             | 25            | Oxalyl-CoA decarboxylase                        |
| 2pan   | 39.5    | 2.0  | 535                     | 592             | 25            | Glyoxylate carboligase                          |
| 5dx6   | 38.8    | 2.6  | 529                     | 557             | 26            | Acetolactate synthase                           |
| 2pgn   | 38.1    | 2.4  | 536                     | 587             | 24            | Cyclohexane-1,2-dione<br>hydrolase              |
| 2ihv   | 37.4    | 2.5  | 526                     | 563             | 27            | Carboxyethylarginine<br>synthase                |
| 6a50   | 37.4    | 2.6  | 508                     | 527             | 23            | Benzoylformate decarboxylase                    |
| 3ey9   | 36.8    | 2.8  | 528                     | 571             | 21            | Pyruvate dehydrogenase                          |
| 4fee   | 35.5    | 3.3  | 532                     | 586             | 21            | Pyruvate oxidase                                |
| 2vbf   | 34.6    | 2.8  | 498                     | 546             | 22            | Branched-chain alpha-<br>ketoacid decarboxylase |
| 1ovm   | 34.3    | 2.6  | 497                     | 535             | 22            | Indole-3-pyruvate<br>decarboxylase              |
| 2q5l   | 33.6    | 3.2  | 492                     | 538             | 24            | Phenylpyruvate decarboxylase                    |
| 2x7j   | 31.0    | 3.2  | 524                     | 579             | 17            | MenD                                            |

\* Only the protein structures with Z-scores of more than 30 are listed.

\* Homologous proteins with same annotation are represented by the enzyme with the highest Z-score value.

**Table S5.** Kinetic constants of EcGCL and its double variants

|            | $K_M$ (mM) | $k_{cat}$ ( $s^{-1}$ ) | $k_{cat}/K_M$ ( $M^{-1}\cdot s^{-1}$ ) |
|------------|------------|------------------------|----------------------------------------|
| Wild type  | 62         | 0.1                    | 1.6                                    |
| R484MQ258A | 31         | 0.08                   | 2.5                                    |
| R484MN283Q | 24         | 0.08                   | 3.5                                    |
| R484MR284M | 54         | 0.04                   | 0.7                                    |
| R484MR108L | 66         | 0.02                   | 0.4                                    |



**Table S6.** Kinetic constants of EcGCL and its triple variants

|                 | $K_M$ (mM) | $k_{cat}$ ( $s^{-1}$ ) | $k_{cat}/K_M$ ( $M^{-1}\cdot s^{-1}$ ) |
|-----------------|------------|------------------------|----------------------------------------|
| R484MN283QA28S  | 28         | 0.06                   | 2.3                                    |
| R484MN283QF114L | 33         | 0.07                   | 2.1                                    |
| R484MN283QL478M | 18         | 0.09                   | 5.2                                    |
| R484MN283QL257M | 76         | 0.07                   | 0.9                                    |
| R484MN283QA485F | 17         | 0.04                   | 2.5                                    |
| R484MN283QR284Q | 28         | 0.05                   | 1.7                                    |

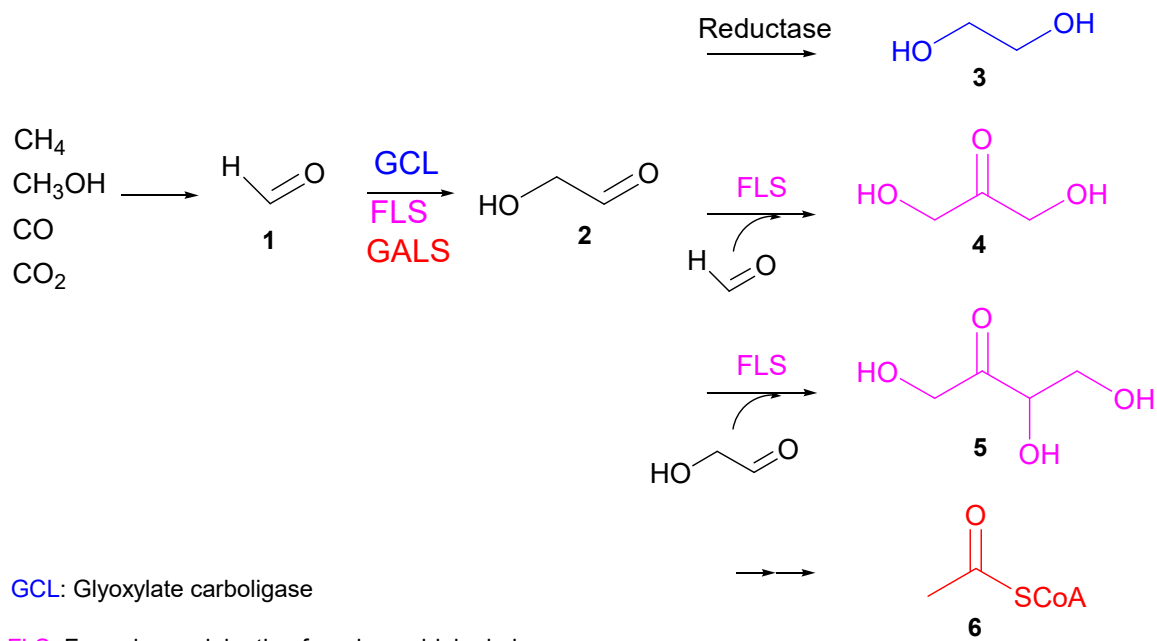

**GCL:** Glyoxylate carboligase

**FLS:** Formolase originating from benzaldehyde lyase

**GALS:** Glycolaldehyde synthase originating from benzoylformate decarboxylase

**Scheme S1. C1 biotransformation pathways.** Formaldehyde (**1**) is enzymatically converted into glycolaldehyde (**2**), which can be transformed into ethylene glycol (**3**), dihydroxyacetone (**4**)<sup>1</sup>, erythrose (**5**)<sup>3</sup>, and acetyl CoA (**6**)<sup>4</sup>.

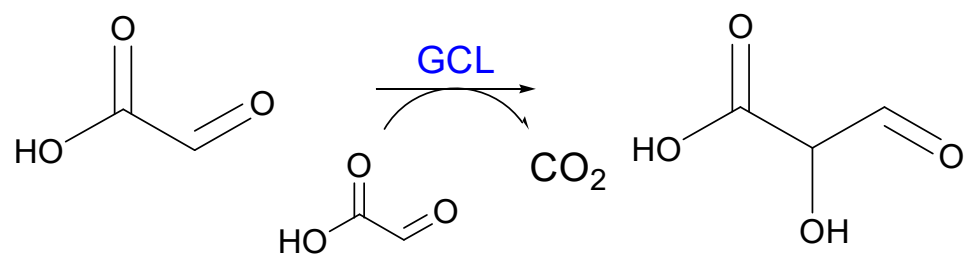

**Scheme S2.** The GCL reaction scheme for the native substrate, glyoxylate<sup>5</sup>.

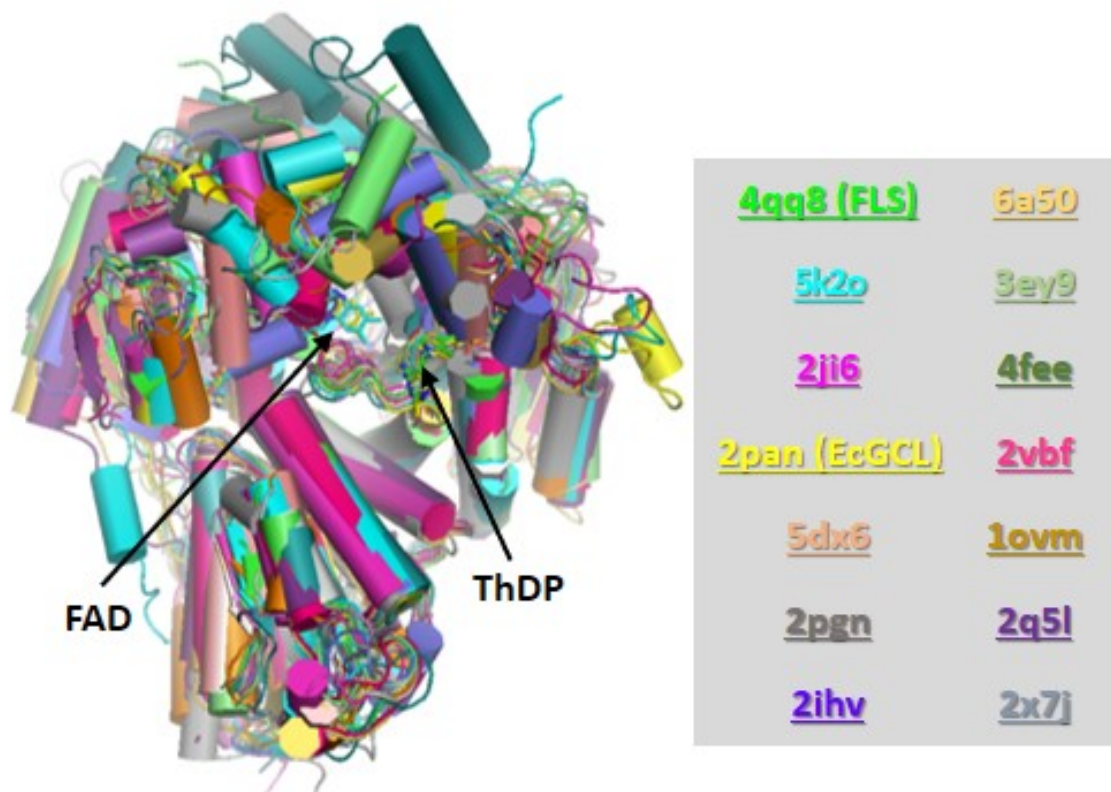

**Figure S1. A ribbon diagram of the superposed structures.** Each structure is differentiated by colors and  $\alpha$ -helices are represented with cylinders. The active site is located, where the two cofactors of ThDP and FAD are bound.

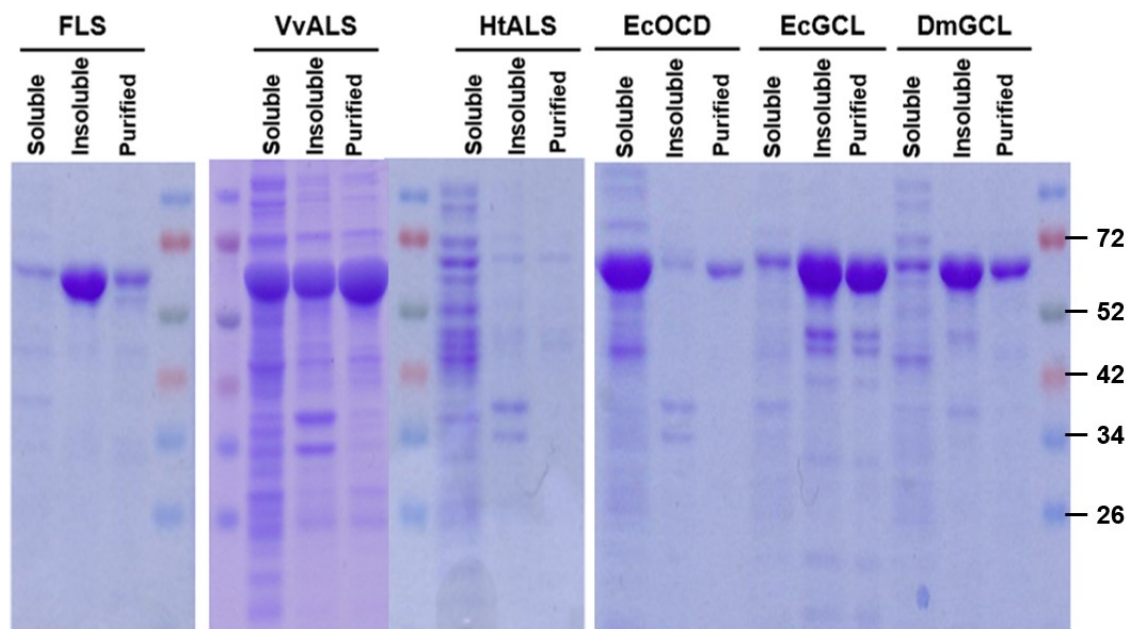

**Figure S2. SDS-PAGE analysis of the enzymes.** The enzymes (FLS, VvALS, HtALS, EcOCD, EcGCL, and DmGCL) were expressed in the recombinant *E. coli* BL21 (DE3) Star and purified by Ni-NTA chromatography. Soluble, soluble fraction; Insoluble, insoluble fraction; Purified, purified protein fraction. The molecular weight markers (kDa) are shown on the right of the panel.

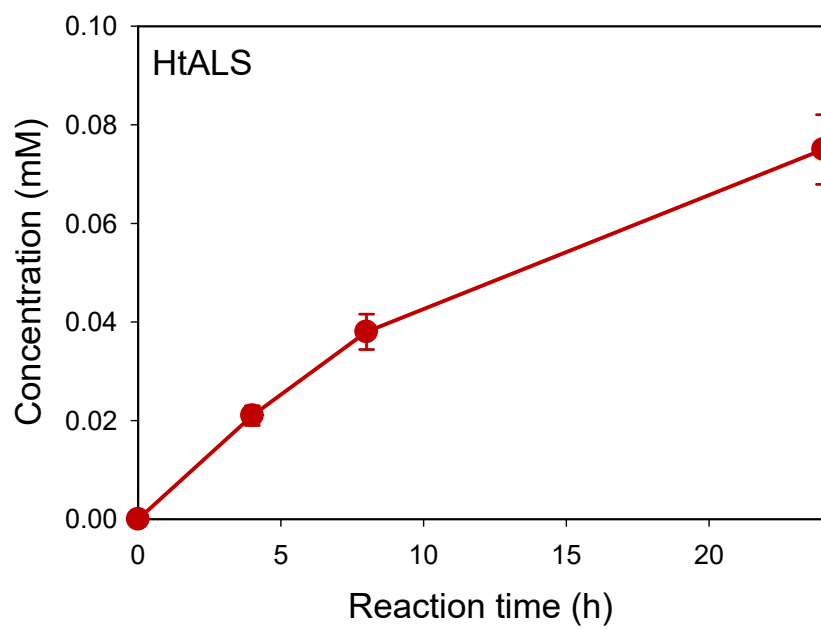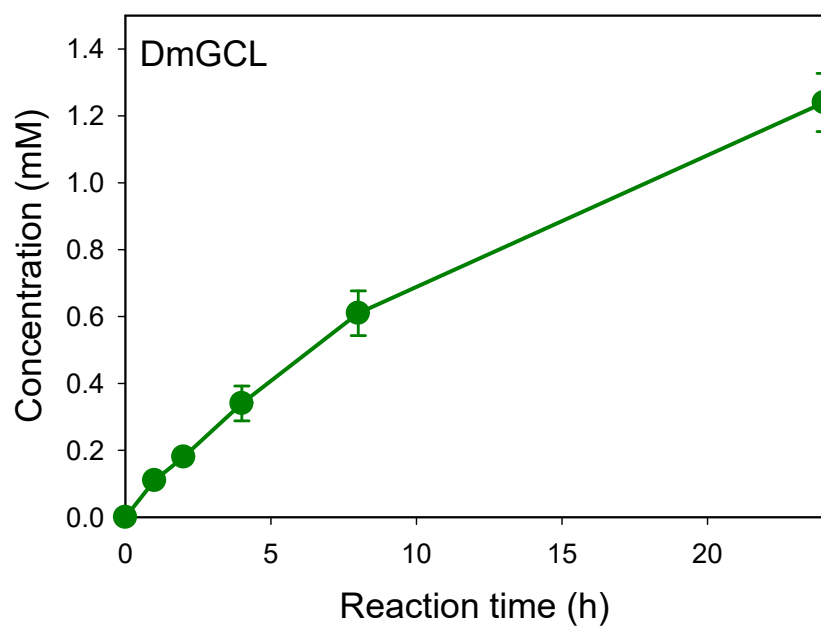

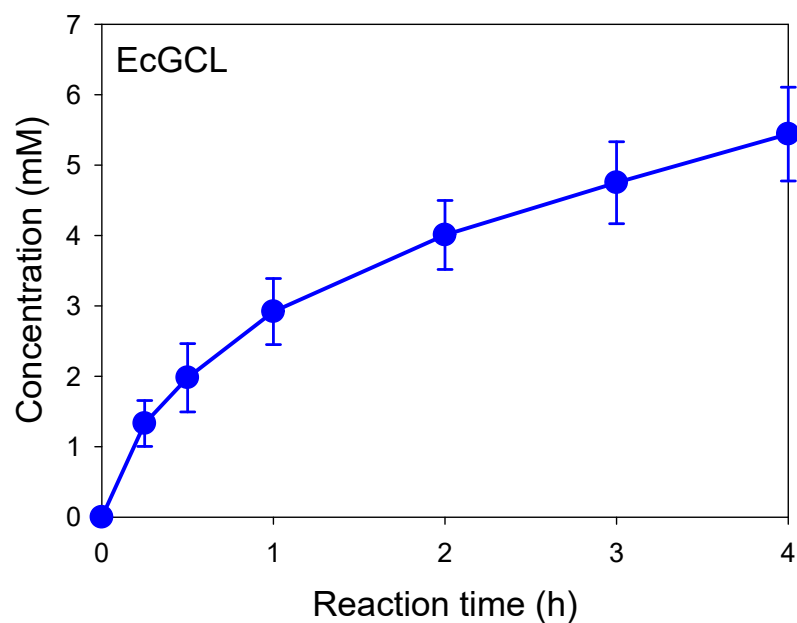

**Figure S3. Time course of formaldehyde biotransformation by the (A) HtALS, (B) DmGCL, and (C) EcGCL.** The enzymes were added to 1 mg/mL in the 50 mM potassium phosphate buffer (pH 6.0) containing 25 mM formaldehyde and sufficient amount of magnesium (II) ion, thiamine pyrophosphate (ThDP), and flavin adenine dinucleotide (FAD).

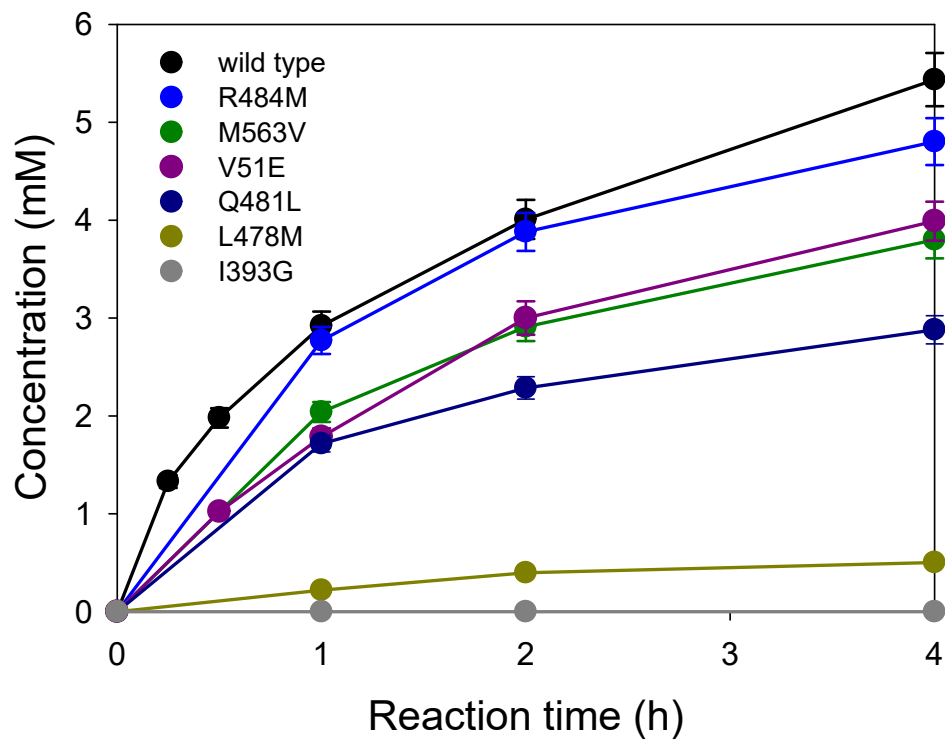

**Figure S4. Time course of formaldehyde biotransformation by purified EcGCL and its variants.** The biotransformation of formaldehyde into glycolaldehyde was initiated by adding 25 mM formaldehyde into the 50 mM potassium phosphate buffer (pH 6.0) containing 1 mg/mL EcGCL and its variants at 50 °C. The reaction buffer also included sufficient amount of magnesium (II) ion, ThDP, and FAD.



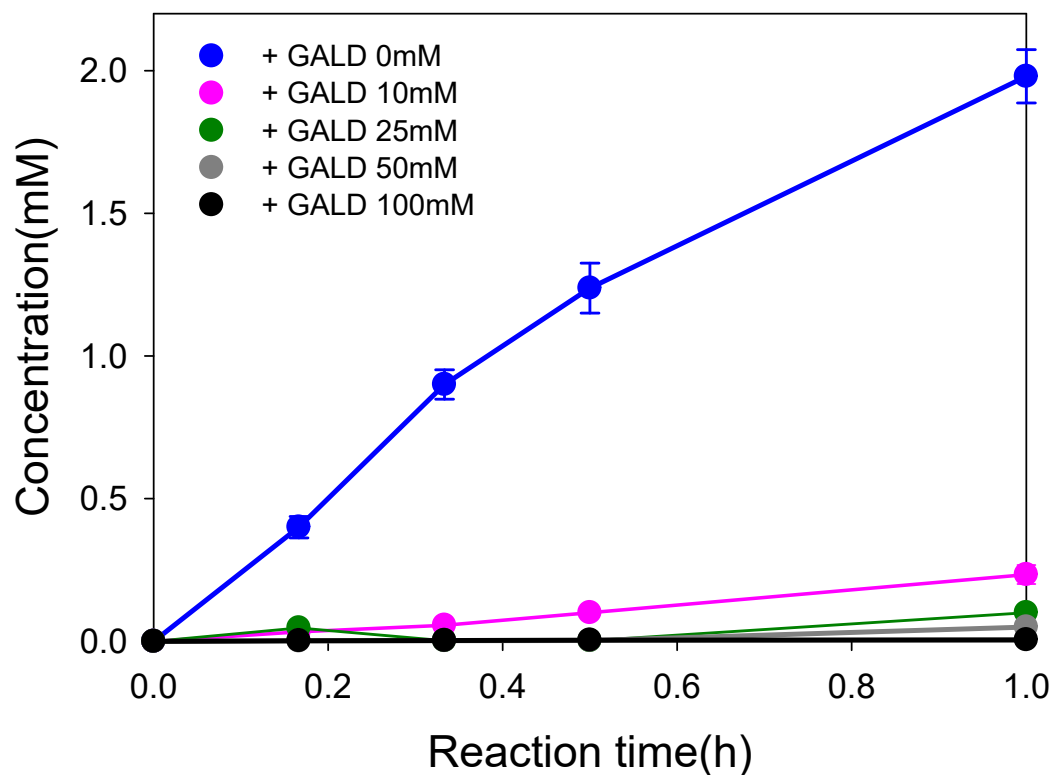

**Figure S5. Toxic effects of glycolaldehyde on EcGCL.** The toxic effects of glycolaldehyde on EcGCL were evaluated after incubation with zero to 100 mM glycolaldehyde for 1 h in the 50 mM potassium phosphate buffer (pH 6.0) (enzyme concentrations: 1 mg/mL). The residual enzyme activities were measured by adding 25 mM formaldehyde into the potassium phosphate buffer at 50 °C.

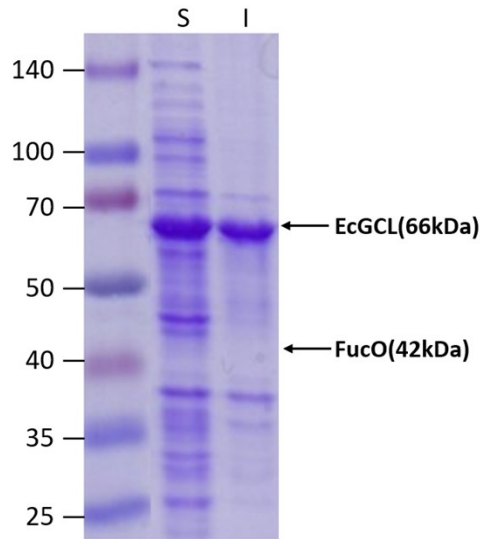

**Figure S6. SDS-PAGE analysis of the proteins expressed in recombinant *E. coli* p.LIC B3-  
EcGCL<sub>R484MN283QL478M</sub>/pACYC-FucO.** S: soluble fraction, I: insoluble fraction. The molecular weight markers (kDa) are shown on the left of the panel.

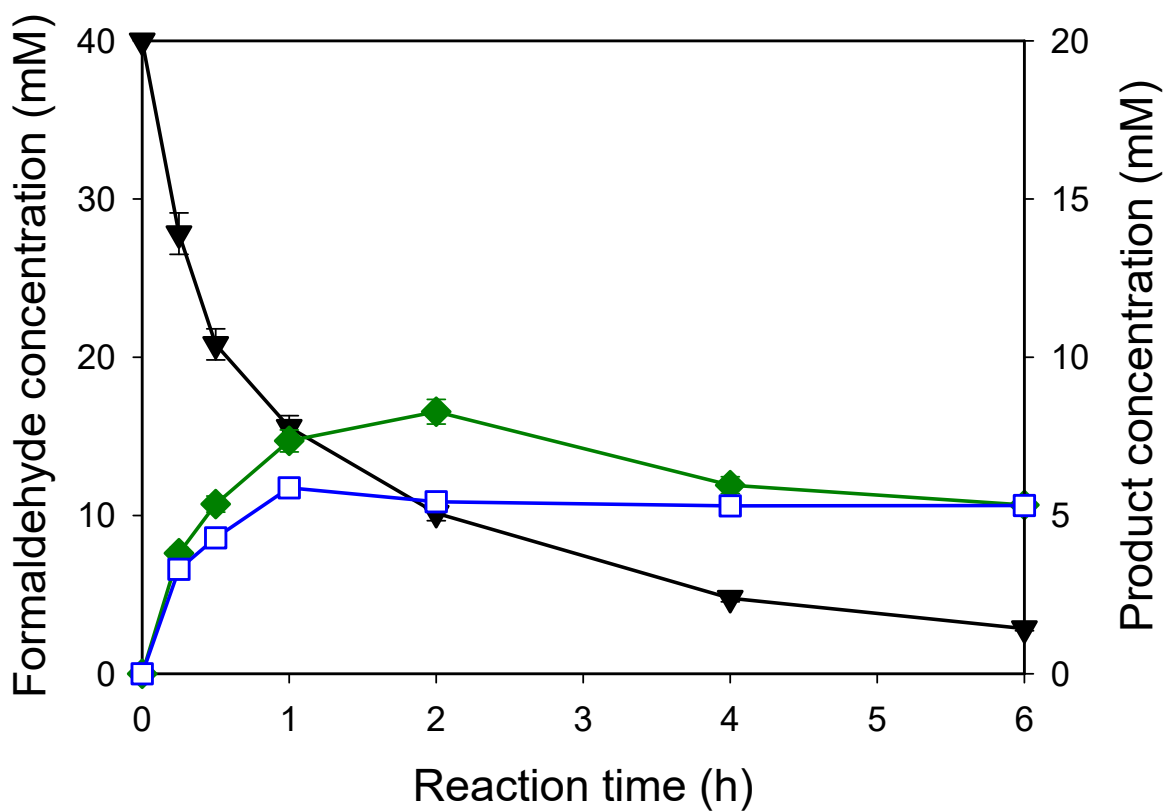

**Figure S7. Time course of the cascade reaction of formaldehyde into ethylene glycol with high concentration.** Biotransformation of formaldehyde into ethylene glycol was initiated by adding 40 mM formaldehyde at t=0 into the potassium phosphate buffer containing 11 g dry cells/L of recombinant *E. coli* expressing the EcGCL<sub>R484MN283QL478M</sub> and FucO. The symbols indicate the concentration of formaldehyde (▼), glycolaldehyde (◆) and ethylene glycol (□).

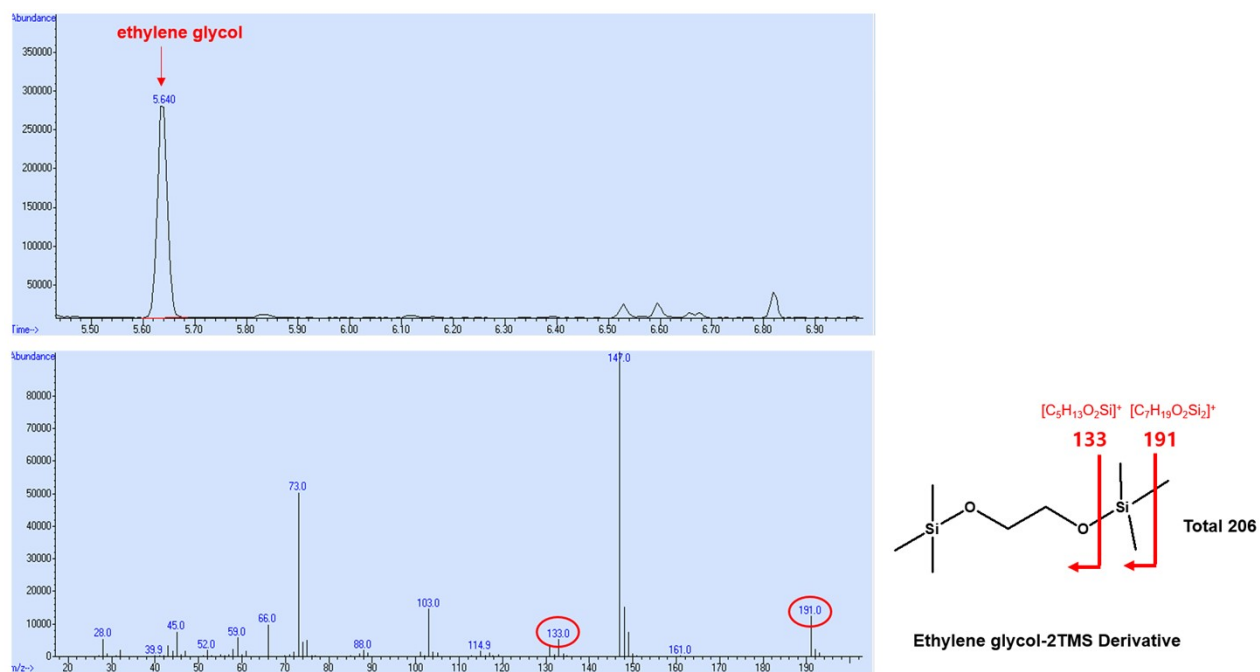

**Figure S8. GC/MS analysis of the reaction products (3) purified.** The reaction products were isolated from the reaction medium, shown in Fig. 5, via extraction with acetonitrile after *in vacuo* evaporation of the reaction broth. The resulting organic layer was evaporated to yield the product as a transparent liquid.

## Reference

1. J. B. Siegel, A. L. Smith, S. Poust, A. J. Wargacki, A. Bar-Even, C. Louw, B. W. Shen, C. B. Eiben, H. M. Tran and E. Noor, *Proc. Natl. Acad. Sci.*, 2015, **112**, 3704-3709.
2. S. Lama, S. M. Ro, E. Seol, B. S. Sekar, S. K. Ainala, J. Thangappan, H. Song, D. Seung and S. Park, *Biotechnol. Bioprocess Eng.*, 2015, **20**, 971-979.
3. S. Güner, V. Wegat, A. Pick and V. Sieber, *Green Chem.*, 2021.
4. X. Lu, Y. Liu, Y. Yang, S. Wang, Q. Wang, X. Wang, Z. Yan, J. Cheng, C. Liu and X. Yang, *Nat. Commun.*, 2019, **10**, 1-10.
5. N. Nemeria, E. Binshtein, H. Patel, A. Balakrishnan, I. Vered, B. Shaanan, Z. e. Barak, D. Chipman and F. Jordan, *Biochemistry*, 2012, **51**, 7940-7952.
